# Supplementary material
Source: PubMed Central journal article supplement (PMC9547843)
Supplement: NIHMS1795090-supplement-1.pdf [file NIHMS1795090-supplement-1.pdf]

**Supplementary Table 1**

Most Common MAGS Per Type

| Final Generic Name                      | Frequency     | Percent<br>(of Total Number<br>of MAGS of<br>Each Type) |
|-----------------------------------------|---------------|---------------------------------------------------------|
| <b>Total Active Meds</b>                | <b>86,174</b> |                                                         |
| <b>Total Delirium MAGS</b>              | <b>13,457</b> | <b>100</b>                                              |
| <b>Top 10 Delirium MAGS</b>             |               |                                                         |
| Oxycodone                               | 2307          | 17.14                                                   |
| Hydrocodone-Acetaminophen               | 660           | 4.9                                                     |
| Tramadol                                | 594           | 4.41                                                    |
| Morphine                                | 569           | 4.23                                                    |
| Famotidine                              | 552           | 4.1                                                     |
| Mirtazapine                             | 515           | 3.83                                                    |
| Ranitidine                              | 486           | 3.61                                                    |
| Lorazepam                               | 412           | 3.06                                                    |
| Loratadine                              | 406           | 3.02                                                    |
| Loperamide                              | 404           | 3                                                       |
| <b>Total Cognitive Impairment MAGS</b>  | <b>14,576</b> | <b>100</b>                                              |
| <b>Top 10 Cognitive Impairment MAGS</b> |               |                                                         |
| Oxycodone                               | 2307          | 15.83                                                   |
| Hydrocodone-Acetaminophen               | 660           | 4.53                                                    |
| Tramadol                                | 594           | 4.08                                                    |
| Morphine                                | 569           | 3.9                                                     |
| Famotidine                              | 552           | 3.79                                                    |
| Mirtazapine                             | 515           | 3.53                                                    |
| Ranitidine                              | 486           | 3.33                                                    |
| Lorazepam                               | 412           | 2.83                                                    |
| Loratadine                              | 406           | 2.79                                                    |
| Loperamide                              | 404           | 2.77                                                    |
| <b>Total Fall MAGS</b>                  | <b>43,861</b> | <b>100</b>                                              |
| <b>Top 10 Fall MAGS</b>                 |               |                                                         |
| Metoprolol                              | 2384          | 5.44                                                    |
| Oxycodone                               | 2307          | 5.26                                                    |
| Gabapentin                              | 1910          | 4.35                                                    |
| Amlodipine                              | 1831          | 4.17                                                    |
| Lisinopril                              | 1583          | 3.61                                                    |
| Torsemide                               | 1325          | 3.02                                                    |
| Insulin                                 | 1185          | 2.7                                                     |
| Furosemide                              | 1157          | 2.64                                                    |
| Tamsulosin                              | 1067          | 2.43                                                    |
| Fluticasone                             | 934           | 2.13                                                    |
| <b>Total Depression MAGS</b>            | <b>15,322</b> | <b>100</b>                                              |
| <b>Top 10 Depression MAGS</b>           |               |                                                         |
| Metoprolol                              | 2384          | 15.56                                                   |
| Oxycodone                               | 2307          | 15.06                                                   |
| Fluticasone                             | 934           | 6.1                                                     |
| Prednisone                              | 753           | 4.91                                                    |
| Carvedilol                              | 692           | 4.52                                                    |
| Hydrocodone-Acetaminophen               | 660           | 4.31                                                    |
| Tramadol                                | 594           | 3.88                                                    |
| Morphine                                | 569           | 3.71                                                    |
| Budesonide- Formoterol                  | 465           | 3.03                                                    |
| Loperamide                              | 404           | 2.64                                                    |
| <b>Total Weight Loss MAGS</b>           | <b>3655</b>   | <b>100</b>                                              |
| <b>Top 10 Weight Loss MAGS</b>          |               |                                                         |
| Metformin                               | 1068          | 29.22                                                   |
| Sertraline                              | 685           | 18.74                                                   |
| Duloxetine                              | 482           | 13.19                                                   |
| Bupropion                               | 353           | 9.66                                                    |
| Fluoxetine                              | 291           | 7.96                                                    |
| Donepezil                               | 259           | 7.09                                                    |
| Azithromycin                            | 144           | 3.94                                                    |
| Topiramate                              | 64            | 1.75                                                    |
| Liraglutide                             | 54            | 1.48                                                    |
| Amantadine                              | 40            | 1.09                                                    |
| <b>Total Incontinence MAGS</b>          | <b>12,889</b> | <b>100</b>                                              |
| <b>Top 10 Incontinence MAGS</b>         |               |                                                         |
| Oxycodone                               | 2307          | 17.9                                                    |
| Gabapentin                              | 1910          | 14.82                                                   |
| Torsemide                               | 1325          | 10.28                                                   |
| Furosemide                              | 1157          | 8.98                                                    |
| Hydrocodone-Acetaminophen               | 660           | 5.12                                                    |
| Tramadol                                | 594           | 4.61                                                    |
| Morphine                                | 569           | 4.41                                                    |

(continued)

**Supplementary Table 1 (continued)**

| Final Generic Name                   | Frequency   | Percent<br>(of Total Number<br>of MAGS of<br>Each Type) |
|--------------------------------------|-------------|---------------------------------------------------------|
| Spironolactone                       | 494         | 3.83                                                    |
| Oxycodone-Acetaminophen              | 373         | 2.89                                                    |
| Tiotropium Bromide                   | 316         | 2.45                                                    |
| <b>Total Incontinence-Women MAGS</b> | <b>1359</b> | <b>100</b>                                              |
| <b>Top Incontinence-Women MAGS</b>   |             |                                                         |
| Tamsulosin                           | 1067        | 78.51                                                   |
| Terazosin                            | 129         | 9.49                                                    |
| Doxazosin                            | 103         | 7.58                                                    |
| Alfuzosin                            | 39          | 2.87                                                    |
| Prazosin                             | 19          | 1.4                                                     |
| Dutasteride-Tamsulosin               | 2           | 0.15                                                    |

**Supplementary Table 2**

Association Between MAGS Quartiles and Hospitalization During the Index 60-Day HHC Episode (Independent Effects)

| Outcome: Hospitalization                                                                               | Hazard Ratio | P Value | 95% Confidence Interval |       |
|--------------------------------------------------------------------------------------------------------|--------------|---------|-------------------------|-------|
| MAGS quartiles: Ref = MAGS quartile 1 (0–3, mean = 2.1)                                                |              |         |                         |       |
| MAGS quartile 2 (4–5, mean = 4.47)                                                                     | 1.095        | .376    | 0.896                   | 1.337 |
| MAGS quartile 3 (6–7, mean = 6.44)                                                                     | 1.112        | .330    | 0.898                   | 1.377 |
| MAGS quartile 4 (8–20, mean = 9.69)                                                                    | 1.123        | .325    | 0.891                   | 1.416 |
| Quartiles of non-MAGS medications (ref = non-MAGS quartile 1, [0–5 non-MAGS medications, mean = 3.65]) |              |         |                         |       |
| Non-MAGS quartile 2 (6–7, mean = 6.50)                                                                 | 0.862        | .182    | 0.693                   | 1.072 |
| Non-MAGS quartile 3 (8–10, mean 8.88)                                                                  | 1.097        | .362    | 0.899                   | 1.339 |
| Non-MAGS quartile 4 (11–21, mean = 13.12)                                                              | 1.230        | .065    | 0.987                   | 1.533 |
| Age                                                                                                    | 0.997        | .464    | 0.989                   | 1.005 |
| Female                                                                                                 | 0.845        | .024    | 0.729                   | 0.978 |
| Married (vs not married)                                                                               | 0.899        | .216    | 0.759                   | 1.064 |
| Race/ethnicity (ref = White)                                                                           |              |         |                         |       |
| Non-White                                                                                              | 1.147        | .168    | 0.944                   | 1.394 |
| Living arrangement (ref = living with others)                                                          |              |         |                         |       |
| Living alone                                                                                           | 0.848        | .083    | 0.704                   | 1.022 |
| Living in aggregate settings                                                                           | 0.901        | .433    | 0.693                   | 1.170 |
| Medicare-Medicaid dual eligibility (ref = Medicare only)                                               | 1.154        | .342    | 0.859                   | 1.551 |
| Referral source (ref: community)                                                                       |              |         |                         |       |
| Acute care hospital                                                                                    | 1.501        | .000    | 1.245                   | 1.810 |
| Post-acute care facilities                                                                             | 1.108        | .451    | 0.849                   | 1.445 |
| Total number of diagnoses                                                                              | 1.018        | .000    | 1.012                   | 1.024 |
| Alzheimer disease and related dementias (diagnosis or symptom)                                         | 1.118        | .166    | 0.955                   | 1.309 |
| Depression (diagnosis of symptom)                                                                      | 1.070        | .391    | 0.917                   | 1.247 |
| Limitations in ADL activities                                                                          | 0.999        | .985    | 0.925                   | 1.079 |
| Caregiver support (ref = adequate caregiver assistance)                                                |              |         |                         |       |
| Inadequate caregiver assistance                                                                        | 0.923        | .382    | 0.771                   | 1.105 |
| Average number of HHC visits per wk                                                                    | 1.003        | .000    | 1.003                   | 1.004 |

**Supplementary Table 3**

Sensitivity Analysis: Association Between MAGS (Tertiles) and Hospitalization During the Index 60-Day HHC Episode

| Outcome: Hospitalization                                                                               | Hazard Ratio | P Value | 95% Confidence Interval |       |
|--------------------------------------------------------------------------------------------------------|--------------|---------|-------------------------|-------|
| Grouping based on MAGS tertiles and number of diagnoses                                                |              |         |                         |       |
| Ref = MAGS tertile 1 (0–4, mean = 2.74) and total diagnoses <10                                        |              |         |                         |       |
| MAGS tertile 2 (5–6, mean = 5.47)*Diagnosis <10                                                        | 1.165        | .480    | 0.762                   | 1.782 |
| MAGS tertile 3 (7–16, mean = 8.75)*Diagnosis <10                                                       | 1.240        | .362    | 0.781                   | 1.969 |
| MAGS tertile 1*Diagnosis ≥10                                                                           | 2.163        | <.001   | 1.644                   | 2.846 |
| MAGS tertile 2*Diagnoses ≥10                                                                           | 2.244        | <.001   | 1.685                   | 2.988 |
| MAGS tertile 3*Diagnoses ≥10                                                                           | 2.210        | <.001   | 1.660                   | 2.940 |
| Quartiles of non-MAGS medications (ref = non-MAGS quartile 1, [0–5 non-MAGS medications, mean = 3.65]) |              |         |                         |       |
| Non-MAGS quartile 2 (6–7, mean = 6.50)                                                                 | 0.855        | .159    | 0.688                   | 1.063 |
| Non-MAGS quartile 3 (8–10, mean 8.88)                                                                  | 1.097        | .358    | 0.900                   | 1.336 |
| Non-MAGS quartile 4 (11–21, mean = 13.12)                                                              | 1.323        | .009    | 1.071                   | 1.635 |
| Age                                                                                                    | 0.995        | .260    | 0.987                   | 1.003 |
| Female                                                                                                 | 0.851        | .031    | 0.735                   | 0.985 |
| Married (vs not married)                                                                               | 0.913        | .289    | 0.771                   | 1.081 |
| Race/ethnicity (ref = White)                                                                           |              |         |                         |       |
| Non-White                                                                                              | 1.151        | .158    | 0.947                   | 1.398 |
| Living arrangement (ref = living with others)                                                          |              |         |                         |       |
| Living alone                                                                                           | 0.859        | .108    | 0.713                   | 1.034 |
| Living in aggregate settings                                                                           | 0.881        | .341    | 0.678                   | 1.144 |
| Medicare-Medicaid dual eligibility (ref = Medicare only)                                               | 1.155        | .339    | 0.860                   | 1.552 |
| Referral source (ref: community)                                                                       |              |         |                         |       |
| Acute care hospital                                                                                    | 1.498        | <.001   | 1.243                   | 1.806 |
| Post-acute care facilities                                                                             | 1.086        | .543    | 0.832                   | 1.417 |
| Alzheimer disease and related dementias (diagnosis or symptom)                                         | 1.108        | .201    | 0.947                   | 1.298 |
| Depression (diagnosis or symptom)                                                                      | 1.076        | .343    | 0.925                   | 1.251 |
| Limitations in ADL activities                                                                          | 1.018        | .642    | 0.944                   | 1.098 |
| Caregiver support (ref = adequate caregiver assistance)                                                |              |         |                         |       |
| Inadequate caregiver assistance                                                                        | 0.918        | .355    | 0.767                   | 1.100 |
| Average number of HHC visits per wk                                                                    | 1.004        | <.001   | 1.003                   | 1.004 |

**Supplementary Table 4**

Sensitivity Analysis: Association Between MAGS (Quintiles) and Hospitalization During the Index 60-Day HHC Episode

| Outcome: Hospitalization                                                                                     | Hazard Ratio | P Value | 95% Confidence Interval |       |
|--------------------------------------------------------------------------------------------------------------|--------------|---------|-------------------------|-------|
| <b>Grouping based on MAGS quintiles and number of diagnoses</b>                                              |              |         |                         |       |
| Ref = MAGS quintile 1 (0–3, mean = 2.13) and total diagnoses <10                                             |              |         |                         |       |
| MAGS quintile 2 (4–4, mean = 4)*Diagnosis <10                                                                | 0.843        | .534    | 0.492                   | 1.443 |
| MAGS quintile 3 (5–5, mean = 5)*Diagnosis <10                                                                | 0.864        | .629    | 0.478                   | 1.562 |
| MAGS quintile 4 (6–7, mean = 6.44)*Diagnosis <10                                                             | 1.396        | .159    | 0.878                   | 2.222 |
| MAGS quintile 5 (8–16, mean = 9.69)*Diagnosis <10                                                            | 1.125        | .698    | 0.620                   | 2.044 |
| MAGS quintile 1* Diagnosis ≥10                                                                               | 1.969        | <.001   | 1.423                   | 2.724 |
| MAGS quintile 2*Diagnosis ≥10                                                                                | 2.239        | <.001   | 1.581                   | 3.171 |
| MAGS quintile 3*Diagnosis ≥10                                                                                | 2.182        | <.001   | 1.540                   | 3.093 |
| MAGS quintile 4*Diagnosis ≥10                                                                                | 2.020        | <.001   | 1.457                   | 2.799 |
| MAGS quintile 5*Diagnosis ≥10                                                                                | 2.244        | <.001   | 1.608                   | 3.130 |
| <b>Quartiles of non-MAGS medications (ref = non-MAGS quartile 1 [0–5 non-MAGS medications, mean = 3.65])</b> |              |         |                         |       |
| Non-MAGS quartile 2 (6–7, mean = 6.50)                                                                       | 0.845        | .131    | 0.679                   | 1.052 |
| Non-MAGS quartile 3 (8–10, mean = 8.88)                                                                      | 1.079        | .454    | 0.885                   | 1.316 |
| Non-MAGS quartile 4 (11–21, mean = 13.12)                                                                    | 1.292        | .019    | 1.043                   | 1.599 |
| <b>Age</b>                                                                                                   |              |         |                         |       |
| Female                                                                                                       | 0.996        | .287    | 0.988                   | 1.004 |
| <b>Married (vs not married)</b>                                                                              |              |         |                         |       |
| Female                                                                                                       | 0.854        | .034    | 0.737                   | 0.988 |
| <b>Married (vs not married)</b>                                                                              |              |         |                         |       |
| Married                                                                                                      | 0.912        | .283    | 0.770                   | 1.079 |
| <b>Race/ethnicity (ref = White)</b>                                                                          |              |         |                         |       |
| Non-White                                                                                                    | 1.151        | .158    | 0.947                   | 1.399 |
| <b>Living arrangement (ref = living with others)</b>                                                         |              |         |                         |       |
| Living alone                                                                                                 | 0.862        | .117    | 0.716                   | 1.038 |
| Living in aggregate settings                                                                                 | 0.885        | .359    | 0.681                   | 1.149 |
| <b>Medicare-Medicaid dual eligibility (ref = Medicare only)</b>                                              |              |         |                         |       |
| Dual eligible                                                                                                | 1.153        | .347    | 0.857                   | 1.550 |
| <b>Referral source (ref: community)</b>                                                                      |              |         |                         |       |
| Acute care hospital                                                                                          | 1.504        | <.001   | 1.248                   | 1.813 |
| Post-acute care facilities                                                                                   | 1.092        | .517    | 0.837                   | 1.425 |
| <b>Alzheimer disease and related dementias (diagnosis or symptom)</b>                                        |              |         |                         |       |
| ADRD                                                                                                         | 1.110        | .194    | 0.948                   | 1.300 |
| <b>Depression (diagnosis or symptom)</b>                                                                     |              |         |                         |       |
| Depression                                                                                                   | 1.068        | .398    | 0.917                   | 1.243 |
| <b>Limitations in ADL activities</b>                                                                         |              |         |                         |       |
| ADL limitations                                                                                              | 1.017        | .663    | 0.943                   | 1.098 |
| <b>Caregiver support (ref = adequate caregiver assistance)</b>                                               |              |         |                         |       |
| Inadequate caregiver assistance                                                                              | 0.918        | .350    | 0.766                   | 1.099 |
| <b>Average number of HHC visits per wk</b>                                                                   |              |         |                         |       |
| Number of visits                                                                                             | 1.004        | <.001   | 1.003                   | 1.004 |
